# Supplementary material
Source: publisher figshare collection journal article supplement (https://gsapubs.figshare.com/ndownloader/files/33897758)
Supplement: Supplementary file 1 [file 33897758]

## Sheet: Table S3
Table S3 Whole rock Sr-Nd isotopes and major element compositions of the studied pelitic migmatites, the Late Cretaceous arc magmatic rocks and Neo-Tethyan ophiolites
Sample	Rock	Longtitude(°N)	Latitude(°E)	Average zircon U-Pb age		Whole rock Sr-Nd isotopes						Whole rock major elements (wt.%)
				Magmatic age	Metamorphic age	87Sr/86Sr	(87Sr/86Sr)i	143Nd/144Nd	(143Nd/144Nd)i	εNd(t)		SiO2	TiO2	Al2O3	Fe2O3	FeO	MnO	MgO	CaO	Na2O	K2O	P2O5	H2O+	CO2	LOI	Total	reference
This study
1-33	Pelitic migmatite	94.05	29.24		87	0.70682	0.706072	0.512626	0.512557	0.59797		60.39	0.84	16.73	1.13	6.29	0.12	3.2	3.8	2.51	2.45	0.12	0.97	0.89	1.06	100.43
77-3	Pelitic migmatite	94.08	29.23		87	0.706797	0.706098	0.51265	0.512573	0.919689		57.87	0.93	17.24	0.97	7.96	0.17	3.42	4.51	1.86	1.71	0.15	1.58	0.77	1.23	99.14
77-8	Pelitic migmatite	94.08	29.23		87	0.707239	0.705674	0.51265	0.512576	0.981271		59.16	0.93	15.48	1.36	7.6	0.15	5.23	2.93	1.81	2.33	0.11	1.73	0.26	1.03	99.08
77-9	Pelitic migmatite	94.08	29.23		87	0.706272	0.705361	0.51264	0.51256	0.661208		61.44	0.87	15.15	1.26	7.06	0.15	4.13	3.74	1.73	2.03	0.26	0.76	1.03	0.99	99.61
77-17	Pelitic migmatite	94.08	29.23		87	0.705678	0.705289	0.51262	0.512531	0.0894036		55.15	1.08	17.75	2.37	8.03	0.22	4.62	4	2.79	1.36	0.08	1.69	0.26	1.07	99.4
76-13	Mafic migmatite	94.0947	29.23	91	87							48.96	0.78	20.75	3.09	6.59	0.23	3.96	8.3	4.44	0.62	0.29	1.38		1.05	99.56
76-33	Mafic migmatite	94.0947	29.23	91	87							43.23	0.89	19.36	5.19	8.93	0.25	5.13	10.09	3	0.55	0.1	1.19	0.34	1.38	98.25
reference date
	Gabbroic-dioritic rocks
09TB21-1	Norite	94.1436	29.2	93		0.704384	0.704362	0.512794	0.512701	3.55		52.17	0.73	18.61	9.48		0.15	4.6	9.15	2.86	0.48	0.08			1.37	99.68	(Ma et al., 2013a)
09TB30-1	Norite	94.0744	29.2136	93		0.70445	0.704384	0.512784	0.51268	3.15		44.53	0.37	4.07	12.98		0.19	24.14	7.85	0.42	0.14	0.02			4.86	99.57	(Ma et al., 2013a)
09TB30-3	Norite	94.0744	29.2136	93		0.704337	0.70433	0.512775	0.512666	2.88		47.92	0.27	16.62	8.12		0.14	8.37	15.57	1.32	0.15	0.01			1.14	99.63	(Ma et al., 2013a)
09TB32	Norite	94.0772	29.2142	93		0.704267	0.704237	0.512784	0.512686	3.27		49.68	0.26	15.77	7.39		0.13	10.31	13.81	0.94	0.25	0.01			1.1	99.67	(Ma et al., 2013a)
09TB41-2	Norite	94.0542	29.2086	93		0.704241	0.704229	0.512775	0.512671	2.98		43.73	0.88	17.14	13.26		0.14	8.63	12.32	1.47	0.24	0.03			1.75	99.59	(Ma et al., 2013a)
09TB44-5	Norite	94.0758	29.1972	93		0.704648	0.704629	0.512802	0.512697	3.49		47.71	0.36	21.8	6.25		0.1	6.93	11.46	3.3	0.46	0.01			1.27	99.66	(Ma et al., 2013a)
09TB49-2	Norite	93.9125	29.1428	93		0.704327	0.704288	0.512768	0.512688	3.3		52.13	0.96	17.8	9.71		0.15	5.43	8.98	3.24	0.63	0.23			0.4	99.66	(Ma et al., 2013a)
09TB30-2	Hornblendite	94.0744	29.2136	93		0.704352	0.704328	0.51279	0.512688	3.31		50.52	0.49	9.28	8.92		0.16	12.26	16.1	0.93	0.23	0.03			0.72	99.64	(Ma et al., 2013a)
09TB35-3	Hornblendite	94.0739	29.2131	93		0.704495	0.704397	0.512797	0.512689	3.32		51.95	0.48	6.98	10.2		0.19	15.18	12.93	0.72	0.21	0			0.76	99.6	(Ma et al., 2013a)
09TB42-2	Hornblendite	94.0528	29.2097	93		0.704402	0.704323	0.512781	0.512676	3.07		51	0.42	6.9	11.14		0.18	16.71	11.05	1	0.19	0.01			0.95	99.56	(Ma et al., 2013a)
09TB43-1	Hornblendite	94.0522	29.2094	93		0.704486	0.704404	0.512798	0.512695	3.45		47.21	0.8	9.11	12.3		0.17	13.75	12.04	3.07	0.32	0.11			0.67	99.55	(Ma et al., 2013a)
09TB43-2	Hornblendite	94.0522	29.2094	93		0.70445	0.704349	0.512782	0.512683	3.21		49.55	0.66	6.11	12.66		0.16	19.05	7.81	0.8	0.3	0.01			2.4	99.53	(Ma et al., 2013a)
09TB44-3	Hornblendite	94.0758	29.1972	93		0.704621	0.704565	0.512823	0.512701	3.56		42.27	2.32	12.7	13.88		0.14	12.78	11.66	2.27	0.66	0.01			0.81	99.5	(Ma et al., 2013a)
09TB21-2	Diorite	94.1436	29.2	92.8		0.704579	0.704335	0.512788	0.512707	3.68		56.03	0.69	17.56	8.03		0.12	3.58	7.59	3.46	1.41	0.14			1.08	99.71	(Ma et al., 2013b)
09TB22	Diorite	94.1422	29.2003	92.8		0.704521	0.704371	0.512786	0.5127	3.55		53.99	0.78	18.1	8.91		0.13	3.98	7.81	3.16	1.01	0.11			1.7	99.69	(Ma et al., 2013b)
09TB38-1	Diorite	94.0592	29.2106	92.8		0.704561	0.704363	0.51275	0.512674	3.03		56.05	0.84	17.6	7.89		0.15	4.32	7.4	3.15	1.41	0.27			0.61	99.69	(Ma et al., 2013b)
09TB39	Diorite	94.0572	29.2094	92.8		0.70443	0.704283	0.512737	0.51266	2.77		59.56	0.67	17.76	6.21		0.1	3.19	6.94	3.39	1.16	0.21			0.57	99.75	(Ma et al., 2013b)
09TB41-3	Diorite	94.0542	29.2086	92.8		0.704427	0.704332	0.512754	0.512677	3.09		55.74	0.75	17.9	7.79		0.12	3.85	7.61	3.57	1.01	0.23			1.14	99.7	(Ma et al., 2013b)
09TB45-3	Diorite	93.9894	29.1656	92.8		0.704448	0.704291	0.512797	0.512709	3.71		57.34	0.74	18.55	8.07		0.11	3	6.82	3.36	1.15	0.17			0.42	99.74	(Ma et al., 2013b)
09TB46-2	Diorite	93.9742	29.1828	92.8		0.704496	0.704218	0.51276	0.512681	3.17		55.68	0.83	18.01	8.47		0.12	3.81	7.28	3.3	1.4	0.17			0.65	99.72	(Ma et al., 2013b)
09TB47-1	Diorite	93.9333	29.1775	92.8		0.704231	0.704218	0.512768	0.512693	3.41		57.95	0.85	21.09	5.5		0.06	1.31	6.87	5.17	0.36	0.15			0.46	99.77	(Ma et al., 2013b)
09TB47-3	Diorite	93.9333	29.1775	92.8		0.704451	0.704223	0.512775	0.512695	3.45		54.51	0.94	17.07	9.78		0.14	4.17	7.45	3.39	1.42	0.21			0.58	99.67	(Ma et al., 2013b)
09TB50	Diorite	93.87	29.1183	92.8		0.704564	0.704234	0.512767	0.512687	3.3		57.91	0.68	17.06	7.07		0.11	2.96	6.4	4.83	1.67	0.17			0.88	99.73	(Ma et al., 2013b)
09TB51-2	Diorite	93.8361	29.1233	92.8		0.704346	0.704227	0.512781	0.512708	3.7		53.91	0.81	18.5	9.66		0.16	3.92	8.06	3.24	0.91	0.21			0.3	99.67	(Ma et al., 2013b)
09TB36	Granodiorite	94.0761	29.2114	92.8		0.704668	0.704405	0.512714	0.512641	2.4		62.47	0.64	16.73	5.74		0.1	2.74	5.66	3.15	1.61	0.2			0.73	99.78	(Ma et al., 2013b)
09TB38-2	Granodiorite	94.0592	29.2106	92.8		0.704559	0.704344	0.512738	0.512665	2.87		63.18	0.58	17.01	5.21		0.1	2.38	5.72	3.23	1.55	0.18			0.64	99.78	(Ma et al., 2013b)
09TB41-1	Granodiorite	94.0542	29.2086	92.8		0.704411	0.704277	0.512738	0.512667	2.89		64.09	0.54	17.53	4.81		0.07	2.24	5.29	3.16	0.98	0.17			1.01	99.88	(Ma et al., 2013b)
09TB45-1	Granodiorite	94.0758	29.1972	92.8		0.704592	0.704202	0.512794	0.51272	3.94		64.39	0.55	16.36	5.66		0.1	2.38	5.03	3.35	1.48	0.12			0.39	99.79	(Ma et al., 2013b)
09TB45-2	Granodiorite	93.9894	29.1656	92.8		0.704645	0.704187	0.512796	0.512725	4.04		65.74	0.48	16.47	4.9		0.08	2.01	4.26	3.31	2.08	0.11			0.37	99.81	(Ma et al., 2013b)
09TB48-1	Granodiorite	93.9133	29.1631	92.8		0.704475	0.704247	0.51279	0.512717	3.88		63.67	0.54	16.46	5.81		0.08	2.23	5.3	3.65	1.4	0.13			0.5	99.77	(Ma et al., 2013b)
T321	Gabbroic diorite			88		0.704307	0.70397	0.512845		4.65		53.8	1.06	17.16	2.05	7	0.16	4.26	7.91	2.83	1.82	0.24			0.7		(Xu et al., 2015)
T323	Gabbroic diorite			88		0.704114	0.70397	0.512842		4.57		52.05	1.23	15.7	3.45	8.3	0.24	5.45	7.89	2.62	1.32	0.3			0.28		(Xu et al., 2015)
T433	Gabbro			88		0.704113	0.70392	0.512808		4.04		51.19	1.13	17.9	3.35	5.6	0.17	4.54	8.2	3.81	1.41	0.35			1.48		(Xu et al., 2015)
T435	Gabbroic diorite			88		0.704146	0.70398	0.51276		3.17		55.27	0.95	17.81	3.49	4.55	0.17	3.79	7.51	3.64	1.32	0.32			0.44		(Xu et al., 2015)
T438	Gabbroic diorite			88		0.703933	0.70381	0.512818		4.23		53.37	0.95	18.02	2.21	5.8	0.15	5.01	8.49	3.23	1.48	0.21			0.18		(Xu et al., 2015)
T367	Granodiorite			88		0.704782	0.70385	0.512789		3.84		64.7	0.58	16.15	4.64		0.07	1.92	3.98	3.68	3.49	0.17			0.25		(Xu et al., 2015)
T369	Granodiorite			88		0.70469	0.70385	0.512804		4.23		66.89	0.54	15.44	3.94		0.05	1.63	3.35	3.8	3.39	0.15			0.36		(Xu et al., 2015)
T664	Mafic granulite	94.12	29.21	89	81	0.704765	0.70454	0.512776	0.512693	3.3		51.81	0.97	18.68	11.55		0.19	4.02	7.04	3.39	1.33	0.3			0.9	100.18	(Guo et al., 2013)
T666	Mafic granulite	94.12	29.21	89	81	0.704394	0.70433	0.512812	0.512727	4		52.83	0.78	19.12	8.66		0.13	4.5	8.05	4.12	0.82	0.19			1.26	100.46	(Guo et al., 2013)
T667	Mafic granulite	94.14	29.2	89	81	0.704502	0.70437	0.512845	0.512759	4.6		54.65	0.78	18.14	8.66		0.14	4.27	7.78	3.33	1.05	0.21			1.31	100.32	(Guo et al., 2013)
T726	Mafic granulite	94.12	29.21	89	81	0.704607	0.70456	0.512753	0.51266	2.7		54.1	0.97	16.73	11.48		0.22	2.85	9.23	2.99	0.49	0.22			0.74	100.02	(Guo et al., 2013)
15LZ02-5	Gabbroic diorite			89		0.704358	0.7043	0.51279		3.75		52.44	1.01	19.15	9.12		0.15	4.43	8.27	4.14	0.81	0.26			0.12	99.9	(Yin et al., 2019)
15LZ05-4	Gabbroic diorite			89		0.704339	0.70426	0.512797		3.83		52.68	0.82	17.81	10.01		0.16	4.29	8.14	3.91	0.98	0.26			0.63	99.69	(Yin et al., 2019)
15LZ08-3	Gabbroic diorite			89		0.704529	0.70435	0.512818		4.16		55.01	0.78	17.63	8.4		0.14	3.78	7.9	3.61	1.22	0.22			1.08	99.76	(Yin et al., 2019)
15LZ03-1	Diorite			89		0.704492	0.70421	0.512798		3.84		57.19	0.67	17.43	7.65		0.13	3.66	7.2	3.83	1.72	0.2			0.36	100.03	(Yin et al., 2019)
15LZ03-2	Diorite			89		0.704617	0.70428	0.512787		3.67		57.45	0.81	17.02	7.49		0.13	3.53	6.74	3.81	1.67	0.23			0.82	99.71	(Yin et al., 2019)
15LZ05-2	Diorite			89		0.704625	0.70424	0.5128		3.93		56.38	0.75	18.11	7.62		0.12	3.56	6.76	3.92	1.87	0.22			0.61	99.9	(Yin et al., 2019)
14GT027	pyroxene hornblende peridotite	94.0752	29.1974	90		0.704386	0.704306	0.51283	0.512701	3.48249		45.17	0.37	4.55	12.84		0.18	23.02	11.06	0.55	0.11	0.01			0.67	97.86	(Guo et al., 2020)
T759	pyroxene hornblendite	94.0759	29.1991	90		0.704455	0.704425	0.51284	0.512713	3.72215		43.07	1.57	11.96	12.29		0.15	13.97	13.23	1.77	0.38	0.01			1.37	98.4	(Guo et al., 2020)
T1362	pyroxene hornblendite	94.0748	29.2132	90		0.704511	0.704405	0.512815	0.512713	3.7277		47.451	0.656	6.37	11.782		0.187	16.618	11.166	1.156	0.306	0.036			3.53894	95.728	(Guo et al., 2020)
T1365	pyroxene hornblendite	94.0457	29.2066	90		0.704359	0.704309	0.512833	0.512707	3.59796		50.212	0.481	5.067	9.678		0.162	18.016	12.289	0.805	0.15	0.018			2.43024	96.878	(Guo et al., 2020)
16GT047	pyroxene hornblendite	94.0358	29.2403	90		0.704414	0.704359	0.51278	0.512667	2.82014		47.27	0.97	8.83	11.58		0.13	14.43	13.63	1.29	0.29	0.01			1.97	98.43	(Guo et al., 2020)
16GT048	pyroxene hornblendite	94.0379	29.2388	90		0.704368	0.704267	0.51279	0.512675	2.97297		47.07	0.85	8.24	10.9		0.11	18.62	9.18	1.12	0.33	0.01			3.18	96.43	(Guo et al., 2020)
T758	hornblendite	94.0759	29.1991	90		0.704589	0.704533	0.512848	0.512722	3.90367		43.12	1.93	11.31	12.74		0.15	14.12	12.12	1.82	0.49	0.02			1.74	97.82	(Guo et al., 2020)
T1352	hornblendite	94.0756	29.1971	90		0.704613	0.704572	0.512863	0.512727	3.99798		44.843	1.727	10.949	11.086		0.146	13.446	12.821	1.761	0.509	0.023			1.9797	97.311	(Guo et al., 2020)
T760	hornblende gabbronorite	94.0759	29.1991	90		0.70458	0.704557	0.512862	0.512743	4.31496		45.77	0.76	20.15	9.48		0.11	7.37	11.5	2.51	0.43	0.01			1.63	98.09	(Guo et al., 2020)
T1353	hornblende gabbronorite	94.0756	29.1971	90		0.704515	0.704506	0.512809	0.512687	3.21076		46.747	0.524	17.827	10.964		0.126	7.003	11.52	2.135	0.206	0.017			1.97	97.069	(Guo et al., 2020)
T1358	hornblende gabbro	94.0758	29.2129	90		0.70445	0.704428	0.512835	0.512745	4.33823		48.681	0.895	18.129	10.325		0.174	5.062	9.606	4.334	0.682	0.221			0.97	98.109	(Guo et al., 2020)
T1360	hornblende gabbro	94.0748	29.2132	90		0.704509	0.704492	0.512834	0.512741	4.279		49.285	0.944	18.669	10.191		0.146	4.632	8.918	4.568	0.765	0.201			1.05	98.319	(Guo et al., 2020)
T1371	tonalite	93.8727	29.1374	90		0.704834	0.704307	0.512808	0.51273	4.05715		60.968	0.616	15.834	5.809		0.089	2.745	5.689	3.493	2.317	0.153			1.67987	97.713	(Guo et al., 2020)
T1372	tonalite	93.8599	29.1392	90		0.704536	0.704281	0.512821	0.512744	4.33439		55.786	0.73	16.985	7.974		0.126	3.705	7.56	3.742	1.465	0.208			0.98039	98.281	(Guo et al., 2020)
16GT063	tonalite	93.8643	28.9942	90		0.705487	0.704198	0.512782	0.512704	3.55367		64.77	0.44	16.15	4.76		0.08	1.82	4.17	3.36	3.42	0.1			1.29	99.07	(Guo et al., 2020)
16GT066	tonalite	93.8705	29.0954	90		0.704464	0.704207	0.512794	0.512716	3.7766		58.64	0.68	17.94	7.31		0.1	3.08	6.42	3.73	1.46	0.17			0.49	99.53	(Guo et al., 2020)
	Granitic rocks
T212	Granite	93.31	29	80		0.705239	0.7048	0.512637	0.51258	0.9		65.93	0.36	16.56	3.16		0.07	0.95	3.35	3.68	2.97	0.13					(Wen et al., 2008)
T027	Granite	93.32	29	82		0.70472	0.7045	0.512699	0.51264	2.2		66.45	0.36	16.57	2.87		0.09	0.83	3.83	4.13	1.84	0.14					(Wen et al., 2008)
T213	Granite	93.34	29.04	80		0.704591	0.7044	0.512748	0.51269	3		65.07	0.36	18.04	3.43		0.11	1	4.4	4.18	2.12	0.14					(Wen et al., 2008)
T215	Granite	93.41	29.1	80		0.7047	0.7045	0.512664	0.51262	1.6		68.28	0.24	17.2	2.14		0.06	0.49	3.21	4.48	2.09	0.06					(Wen et al., 2008)
T026	Granite	93.44	29.12	80		0.704693	0.7044	0.512747	0.5127	3.2		70.11	0.16	15.95	1.41		0.04	0.32	2.61	4.38	2.2	0.04					(Wen et al., 2008)
T216A	Granite	93.61	29.17	80		0.704525	0.7044	0.512706	0.51266	2.4		67.89	0.3	17.04	2.52		0.05	0.61	3.44	4.46	1.82	0.08					(Wen et al., 2008)
T217	Granite	93.64	29.14	80		0.704655	0.7044	0.512673	0.51262	1.7		68.78	0.23	17.59	1.83		0.06	0.44	3.32	4.46	2.1	0.06					(Wen et al., 2008)
T024	Granite	93.75	29.14	80		0.704562	0.7044	0.512702	0.51265	2.3		69.53	0.26	17.65	2.22		0.07	0.58	3.54	4.41	1.73	0.1					(Wen et al., 2008)
T218B	Granite	93.75	29.14	80		0.704581	0.7044	0.512709	0.51265	2.3		67.79	0.29	16.96	2.5		0.06	0.63	3.45	4.26	2.15	0.09					(Wen et al., 2008)
BB-59	Granite	93.12	29.12	78.1		0.705405	0.704964	0.512629	0.512578	0.79		72.01	0.14	16.01	1.2		0.05	0.12	2.27	4.72	3.54	0.04	0.48	0.09	0.38		(Zheng et al., 2014)
BB-68	Granite	93.12	29.12	78.1		0.705427	0.705262	0.512708	0.51265	2.28		66.44	0.33	16.85	3.08		0.1	0.94	3.77	4.71	2.23	0.15	0.94	0.44	1		(Zheng et al., 2014)
BB-113	Granite	93.12	29.12	76.3		0.705783	0.704677	0.512658	0.512559	0.41		73.33	0.09	15.16	1		0.07	0.39	1.7	4.22	3.61	0.04	0.24	0.17	0.5		(Zheng et al., 2014)
BB-114	Granite	93.12	29.12	79.7		0.706185	0.704345	0.512699	0.512587	0.96		72.36	0.07	15.62	0.74		0.04	0.21	1.69	4.06	4.59	0.03	0.12	0.26	0.33		(Zheng et al., 2014)
BB-115	Granite	93.55	29.12	79.7		0.70472	0.704432	0.512683	0.512608	1.37		66.65	0.3	17.56	3.06		0.09	0.84	3.93	4.57	2.52	0.15	0.14	0.35	0.8		(Zheng et al., 2014)
BB-116	Granite	93.55	29.12	76.1		0.704561	0.704374	0.512707	0.512631	1.82		67.7	0.25	18.24	2.36		0.06	0.48	3.54	5.41	1.85	0.08	0.34	0.17	0.36		(Zheng et al., 2014)
12LS209	Granite	93.52	29.17	78		0.704474	0.704331	0.512713	0.512663	2.6		67.13	0.23	16.82	2.21		0.06	0.57	3.45	5.01	1.96	0.1			0.68	98.38	(Tang et al., 2019)
12LS215	Granite	93.47	29.15	78		0.704754	0.70454	0.512644	0.512593	1.2		68.77	0.16	16.86	1.49		0.05	0.37	2.74	5.15	2.46	0.06			0.56	98.8	(Tang et al., 2019)
12LS217	Granite	93.45	29.12	78		0.704575	0.704327	0.512692	0.512643	2.2		66.39	0.18	18.06	1.88		0.07	0.46	3.03	5.19	2.77	0.07			0.78	99.05	(Tang et al., 2019)
12LS256	Granite	93.12	29.11	78		0.705361	0.704568	0.51261	0.512553	0.5		70.75	0.07	16.15	0.88		0.08	0.19	2	4.55	3.53	0.05			0.81	99.17	(Tang et al., 2019)
12LS257	Granite	93.15	29.12	78		0.705369	0.704733	0.512627	0.512573	0.8		70.28	0.09	15.69	1.08		0.06	0.21	2.19	4.11	3.78	0.03			0.48	98.15	(Tang et al., 2019)
12LS269	Granite	93.31	29	78		0.705248	0.704801	0.512622	0.512567	0.7		66.92	0.33	16.04	3.13		0.09	0.98	3.28	4.07	3.16	0.15			1.53	99.81	(Tang et al., 2019)
12LS274	Granite	93.39	29.08	78		0.704703	0.704367	0.512676	0.512624	2.6		66.38	0.19	17.46	1.93		0.08	0.47	3.01	4.73	3.28	0.08			0.64	98.43	(Tang et al., 2019)
12LS276	Granite	93.74	29.13	78		0.704623	0.704321	0.512711	0.512664	1.8		69.56	0.18	15.86	1.77		0.06	0.44	2.75	4.31	3.36	0.08			0.63	99.14	(Tang et al., 2019)
12LS278	Granite	93.74	29.14	78		0.704522	0.704334	0.5127	0.512652	2.4		67.71	0.25	16.68	2.53		0.07	0.64	3.47	4.73	2.04	0.13			0.84	99.24	(Tang et al., 2019)
	Neo-Tethyan ophiolites
Zc-05	Gabbro			110		0.703024	0.70296	0.513086		8.7		48.97	0.96	16.33	9		0.2	6.61	10.98	3.54	0.24	0.18			2.67	99.68	(Xu et al., 2004)
ZC-186	Basalt			110		0.704681	0.70461	0.513098		8.7		53.28	0.87	13.79	9.53		0.31	6.99	6.82	4.87	0.14	0.1			2.67	99.37	(Xu et al., 2004)
ZC-192	Gabbro			110		0.703488	0.7034	0.513113		9.1		51.59	0.72	16.36	10.26		0.16	6.73	9.09	2.78	0.28	0.15			1.76	99.88	(Xu et al., 2004)
ZC-232	Gabbro			110		0.703972	0.70384	0.512942		6.4		49.67	0.94	14.8	13.45		0.11	4.74	7.59	4.19	0.2	0.1			4.36	100.15	(Xu et al., 2004)
ZC-206	Basalt			110		0.704622	0.70451	0.513109		9.1		46.84	0.18	14.12	12.28		0.21	12.91	9.59	0.87	0.18	0.04			1.98	99.21	(Xu et al., 2004)
CY-1	Gabbro			90		0.703631	0.7036	0.513036		6.1		46.99	0.07	18.58	3.28		0.08	9.99	17.88	1.03	0.02	0.04			1.41	99.35	(Xu et al., 2004)
DJB98-18	Gabbro			130		0.70461	0.7046	0.513049		7.9																	(Zhang et al., 2005)
BAR98-1	Gabbro			130		0.70413	0.70399	0.513109		8.8																	(Zhang et al., 2005)
BAR98-3	Gabbro			130		0.70485	0.70402	0.513107		8.7																	(Zhang et al., 2005)
DQ98-9	Gabbro			130		0.70321	0.7032	0.513114		8.4																	(Zhang et al., 2005)
DQ98-12	Gabbro			130		0.70307	0.70305	0.513114		8.5																	(Zhang et al., 2005)
DQ98-14	Diabase			130		0.70295	0.70293	0.513111		8.7																	(Zhang et al., 2005)
XL98-10	Diabase			120		0.70345	0.70339	0.513083		8.5																	(Zhang et al., 2005)
DZ98-1	Gabbro			120		0.70356	0.70354	0.513118		8.9																	(Zhang et al., 2005)
DZ98-12	Diabase			120		0.70451	0.7045	0.513108		8.9																	(Zhang et al., 2005)
DZ98-19	Basalt			120		0.70433	0.70427	0.51308		8.5																	(Zhang et al., 2005)
LC98-3	Basalt			120		0.70472	0.70455	0.513109		8.8																	(Zhang et al., 2005)
LC98-4	Basalt			120		0.70485	0.70446	0.513133		8.8																	(Zhang et al., 2005)
LC98-6	Basalt			120		0.70483	0.70451	0.513136		8.8																	(Zhang et al., 2005)
12FW89	Diabase			130		0.703511	0.703485	0.513027		7.3		48.61	0.92	15.78	9.67		0.15	7.06	11.26	3.56	0.02	0.08			2.76	99.87	(Zhang et al., 2016)
12FW90	Diabase			130		0.703523	0.703502	0.513087		8.5		38.51	1.27	15.62	12.23		0.2	10.27	15.82	0.35	0.01	0.07			5.2	99.55	(Zhang et al., 2016)
12FW93	Diabase			130		0.703081	0.703009	0.512911		5		49.85	0.84	15.56	9.06		0.15	7.22	11.36	3.18	0.19	0.07			1.9	99.38	(Zhang et al., 2016)
12FW169	Gabbro			130		0.704833	0.70482	0.51314		8.2		53.03	0.12	15.29	4.36		0.06	11.07	8.31	4.08	0.07	0.01			2.78	99.18	(Zhang et al., 2016)
12FW181	Gabbro			130		0.704578	0.70455	0.513105		7		48.58	0.2	9.55	9.58		0.23	16	10.51	1.43	0.03	0.01			3.16	99.28	(Zhang et al., 2016)
References
Guo, L., Zhang, H.F., Harris, N., Pan, F.B., Xu, W.C., 2013. Late Cretaceous (~ 81 Ma) high-temperature metamorphism in the southeastern Lhasa terrane: implication for the Neo-Tethys ocean ridge subduction. Tectonophysics 608, 112-126.
Guo, L., Jagoutz, O., Shinevar, W.J., Zhang, H.-F., 2020. Formation and composition of the Late Cretaceous Gangdese arc lower crust in southern Tibet. Contributions to Mineralogy and Petrology 175 (6).
Ma, L., Wang, Q., Li, Z.X., Wyman, D.A., Jiang, Z.Q., Yang, J.H., Gou, G.N., Guo, H.F., 2013a. Early Late Cretaceous (ca. 93 Ma) norites and hornblendites in the Milin area, eastern Gangdese: Lithosphere–asthenosphere interaction during slab roll-back and an insight into early Late Cretaceous (ca. 100–80 Ma) magmatic “flare-up” in southern Lhasa (Tibet). Lithos 172, 17-30.
Ma, L., Wang, Q., Wyman, D.A., Li, Z.X., Jiang, Z.Q., Yang, J.H., Gou, G.N., Guo, H.F., 2013b. Late Cretaceous (100–89 Ma) magnesian charnockites with adakitic affinities in the Milin area, eastern Gangdese: Partial melting of subducted oceanic crust and implications for crustal growth in southern Tibet. Lithos 175, 315-332.
Tang, Y.-W., Chen, L., Zhao, Z.-F., Zheng, Y.-F., 2019. Geochemical evidence for the production of granitoids through reworking of the juvenile mafic arc crust in the Gangdese orogen, southern Tibet. GSA Bulletin 132 (7-8), 1347-1364.
Wen, D.R., Chung, S.L., Song, B., Iizuka, Y., Yang, H.J., Ji, J.Q., Liu, D.Y., Gallet, S., 2008. Late Cretaceous Gangdese intrusions of adakitic geochemical characteristics, SE Tibet: Petrogenesis and tectonic implications. Lithos 105 (1), 1-11.
Xu, J.-F., Castillo, P.R., 2004. Geochemical and Nd–Pb isotopic characteristics of the Tethyan asthenosphere: implications for the origin of the Indian Ocean mantle domain. Tectonophysics 393 (1), 9-27.
Xu, W.C., Zhang, H.F., Luo, B.J., Guo, L., Yang, H., 2015. Adakite-like geochemical signature produced by amphibole-dominated fractionation of arc magmas: An example from the Late Cretaceous magmatism in Gangdese belt, south Tibet. Lithos 232, 197-210.
Yin, C., Ou, J., Long, X., Huang, F., Zhang, J., Li, S., Wang, L., Xia, X., He, X., 2019. Late Cretaceous Neo-Tethyan slab roll-back: Evidence from zircon U-Pb-O and whole-rock geochemical and Sr-Nd-Fe isotopic data of adakitic plutons in the Himalaya-Tibetan Plateau. GSA Bulletin 132 (1-2), 409-426.
Zhang, C., Liu, C.-Z., Wu, F.-Y., Zhang, L.-L., Ji, W.-Q., 2016. Geochemistry and geochronology of mafic rocks from the Luobusa ophiolite, South Tibet. Lithos 245, 93-108.
Zhang, S.-Q., Mahoney, J.J., Mo, X.-X., Ghazi, A.M., Milani, L., Crawford, A.J., Guo, T.-Y., Zhao, Z.-D., 2005. Evidence for a Widespread Tethyan Upper Mantle with Indian-Ocean-Type Isotopic Characteristics. Journal of Petrology 46 (4), 829-858.
Zheng, Y.C., Hou, Z.Q., Gong, Y.L., Liang, W., Sun, Q.Z., Zhang, S., Fu, Q., Huang, K.X., Li, Q.Y., Li, W., 2014. Petrogenesis of Cretaceous adakite-like intrusions of the Gangdese Plutonic Belt, southern Tibet: Implications for mid-ocean ridge subduction and crustal growth. Lithos 190-191, 240-263.
